# Supplementary material for: Cytochrome b marker reveals an independent lineage of Stenella coeruleoalba in the Gulf of Taranto
Source: PubMed Central journal article supplement (PMC6426239; doi:10.1371/journal.pone.0213826), 2019-03-20
Supplement: pone.0213826.s001.pdf [file pone.0213826.s001.pdf]

**Table S1.** *Stenella coeruleoalba* cytochrome b haplotypes and the relative ENA ID

| Haplotypes | Accession numbers                                                                                                                                                                        |
|------------|------------------------------------------------------------------------------------------------------------------------------------------------------------------------------------------|
| Hap 1      | LT971396                                                                                                                                                                                 |
| Hap 2      | LT971397                                                                                                                                                                                 |
| Hap 3      | LT971398                                                                                                                                                                                 |
| Hap 4      | LT971399; LT971404                                                                                                                                                                       |
| Hap 5      | LT971400; LT971401; LT971402; LT971403                                                                                                                                                   |
| Hap 6      | LT971405                                                                                                                                                                                 |
| Hap 7      | LT971406                                                                                                                                                                                 |
| Hap 8      | LT971407                                                                                                                                                                                 |
| Hap 9      | LT971408                                                                                                                                                                                 |
| Hap 10     | LT971409; LT971410; LT971411; LT971412; LT971413; LT971414; LT971415;<br>LT971416; LT971417; LT971418; LT971419; KF691951; KF691963; KF691964;<br>KF691966; KF692000; KF692005; KF692006 |
| Hap 11     | LT971420; KF692014                                                                                                                                                                       |
| Hap 12     | KF691978                                                                                                                                                                                 |
| Hap 13     | KF691984; DQ466021                                                                                                                                                                       |
| Hap 14     | KF691996; DQ466022                                                                                                                                                                       |
| Hap 15     | KF692018; DQ466024                                                                                                                                                                       |
| Hap 16     | KF691992                                                                                                                                                                                 |
| Hap 17     | KF692003; KF692001; KF691976                                                                                                                                                             |
| Hap 18     | KF691959                                                                                                                                                                                 |
| Hap 19     | KF691961                                                                                                                                                                                 |
| Hap 20     | KF692015                                                                                                                                                                                 |
| Hap 21     | KF692009; KF692008; KF691965; AF084082                                                                                                                                                   |
| Hap 22     | KF691950                                                                                                                                                                                 |
| Hap 23     | KF692017; DQ466018                                                                                                                                                                       |
| Hap 24     | KF692016; KF692011; DQ466017; EF090637                                                                                                                                                   |
| Hap 25     | KF691962; DQ466016                                                                                                                                                                       |
| Hap 26     | KF692004                                                                                                                                                                                 |
| Hap 27     | KF691999                                                                                                                                                                                 |
| Hap 28     | KF691998; KF691997; KF691993; AF084081                                                                                                                                                   |
| Hap 29     | KF692010; KF692007; KF692002; KF691960; DQ466023; DQ466020                                                                                                                               |
| Hap 30     | EU557097; NC_012053                                                                                                                                                                      |

Acc. Numbers of the present work are from LT971396 to LT971420
