# Supplementary material for: Cytochrome b marker reveals an independent lineage of Stenella coeruleoalba in the Gulf of Taranto
Source: PubMed Central journal article supplement (PMC6426239; doi:10.1371/journal.pone.0213826), 2019-03-20
Supplement: pone.0213826.s002.pdf [file pone.0213826.s002.pdf]

**Table S2.** Cytochrome b haplotype sequences used for the phylogenetic tree.

| Haplotypes            |         | Accession numbers                                                                                                                                                                                                                                                                                                                                                                                                                                               |
|-----------------------|---------|-----------------------------------------------------------------------------------------------------------------------------------------------------------------------------------------------------------------------------------------------------------------------------------------------------------------------------------------------------------------------------------------------------------------------------------------------------------------|
| Stenella clymene      | Ste_cly | KF692012; KF691985; KF691958;<br>KF691994; KF692013; KF691986 <sup>(1)</sup> ;                                                                                                                                                                                                                                                                                                                                                                                  |
| Stenella frontalis    | Ste_fro | AF084089; AF084090                                                                                                                                                                                                                                                                                                                                                                                                                                              |
| Stenella longirostris | Ste_lon | KF691954 <sup>(2)</sup> ; KF691980; KF691956; AF084102;<br>KF691981 <sup>(3)</sup> ; KF691977; KF691983; KF691975;<br>X56293; X56292; KF691953; KF691957; KF691970;<br>KF691952 <sup>(4)</sup> ; KF691968; KF691974; KF691967 <sup>(5)</sup>                                                                                                                                                                                                                    |
| Stenella attenuata    | Ste_att | AF084097; X56294; EU557096 <sup>(6)</sup> ;<br>AF084096 <sup>(7)</sup> ; KX857269 <sup>(8)</sup>                                                                                                                                                                                                                                                                                                                                                                |
| Tursiops aduncus      | Tur_adu | AF084091 <sup>(9)</sup> ; AF084092 <sup>(10)</sup> ;                                                                                                                                                                                                                                                                                                                                                                                                            |
| Tursiops truncatus    | Tur_tru | AF084093; AF084094; AF084095; DQ466025;<br>DQ466026 <sup>(11)</sup> ; DQ466027 <sup>(12)</sup> ; DQ466028 <sup>(13)</sup> ; DQ466029;<br>EU557093 <sup>(14)</sup>                                                                                                                                                                                                                                                                                               |
| Delphinus delphis     | Del_del | JX264697 <sup>(15)</sup> ; JX264703 <sup>(16)</sup> ; JX264702; JX264599 <sup>(17)</sup> ;<br>JX264690 <sup>(18)</sup> ; JX264696 <sup>(19)</sup> ; JX264616 <sup>(20)</sup> ; JX264700;<br>JX264701 <sup>(21)</sup> ; JX264632; JX264601 <sup>(22)</sup> ; JX264611;<br>JX264676 <sup>(23)</sup> ; JX264683 <sup>(24)</sup> ; KM225666; KM225667;<br>KM225670; KC297765 <sup>(25)</sup> ; KC297766 <sup>(26)</sup> ; DQ378159;<br>DQ378160; KM225664; KM225665 |

Accession Numbers sharing the same 421 bp sequence:

- (1) from KF691986 to KF691991 as well as AF084083;
- (2) KF691954, KF691958, KF691979 as well as AF084100;
- (3) KF691981, KF691982 as well as AF084101;
- (4) KF691952 and AF084103;
- (5) KF691967, KF691969 and KF691971;
- (6) EU557096 and NC012051;
- (7) AF084096 and EF093030;
- (8) KX857269, KX857273, KX857279, KX857280, KX857281, KX857286, KX857310, KX857314, KX857327, KX857333 and KX857341;
- (9) AF084091, KF570335 and KF570337- KF570343;
- (10) AF084092, AF084094, KF570389 and JN571479;
- (11) DQ466026, KF570322, KF570326, KF570327, KF570332, KT601198 and MF669486;
- (12) DQ466027, KF570320-21, KF570323-25, KF570328-30, KF570333-34, KT601188-89, KT601195, KT601200 and MF669485;
- (13) DQ466028, KF570316-17, KF570319, KF570345-47, KF570349, KF570351-52, KT601190, KT601192-93
- (14) EU557093, JN571478, JN571480, KF570379, KF570385-86 and KT601204;
- (15) JX264697, JX264661, JX264652, JX264634, JX264628, JX264624, JX264621, JX264619, JX264614 and AF084085;
- (16) JX264703, MF669498, MF669496, KM225671, KM225668, KM225661, KC297763, KC297759, KC297743, KC297739, KC297738, KC297736, KC297735, KC297722, JX264675, JX264673, JX264667, JX264639, JX264610, JX264596, DQ378161, DQ378155, DQ378153, DQ378150, DQ378148, DQ378139 and AF084084;
- (17) JX264599, KC297725, KC297724, DQ378145, DQ378143 and DQ378141;
- (18) JX264690, JX264663 and JX264631;
- (19) JX264696, KM225663 and JX264633;
- (20) JX264616, KC297742, JX264605, JX264603; JX264600, EF090636, DQ378164 and DQ378156;
- (21) JX264701 and JX264655;
- (22) JX264601, KC297762 and DQ378157;
- (23) JX264676, KC297761; KC297728, JX264607, JX264598, JX264595, JX264576, DQ378163, DQ378158, DQ378152, DQ378147, DQ378146 and DQ378140;
- (24) JX264683 and JX264662;
- (25) KC297765 and DQ378154;
- (26) KC297766, KC297723, DQ378162 and DQ378142.
